# Supplementary material
Source: publisher figshare collection journal article supplement (https://plos.figshare.com/articles/dataset/_/3928302)
Supplement: Supplementary file [file 1]

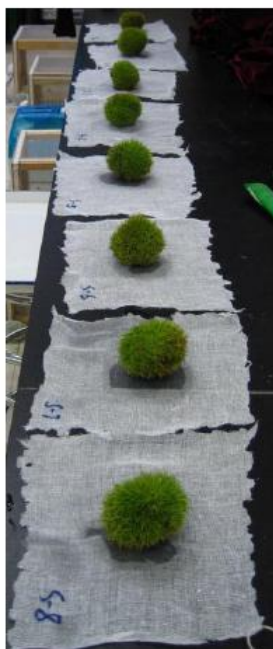

Preparation of chestnut burs for oviposition selection

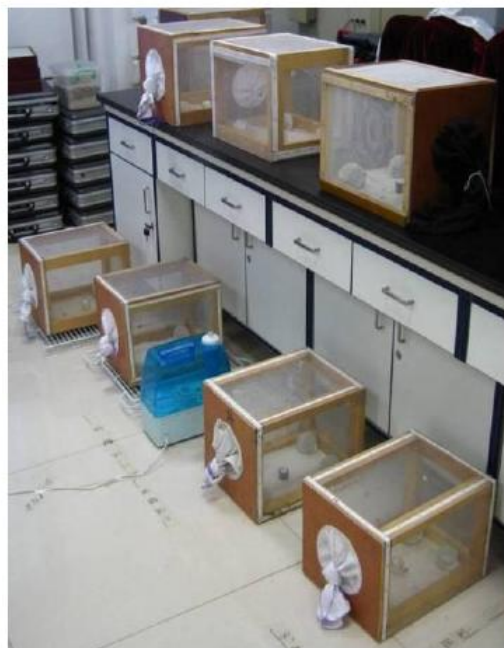

Wood-frame cage (35 cm×27cm ×25 cm) used for oviposition selection test

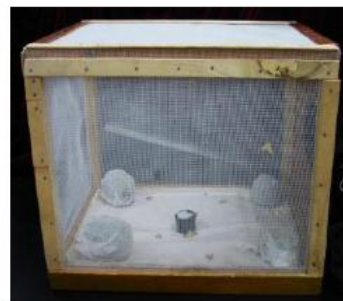

Profile view of the test cage

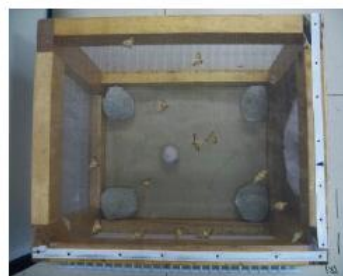

Plan view of the test cage

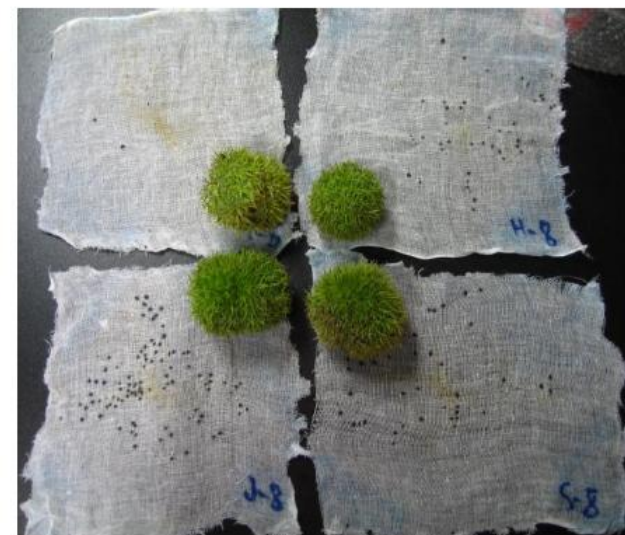

Clothes with *Conogethes punctiferalis* eggs (marked in black)
